# Supplementary material for: Inhibition of Phosphatidylcholine-Specific Phospholipase C Interferes with Proliferation and Survival of Tumor Initiating Cells in Squamous Cell Carcinoma
Source: PLOS journal article supplement (doi:10.1371/journal.pone.0136120), 2015-09-24
Supplement: S3 (10.1371/journal.pone.0136120.s003) [file journal.pone.0136120.s003]

## A431 spheroids

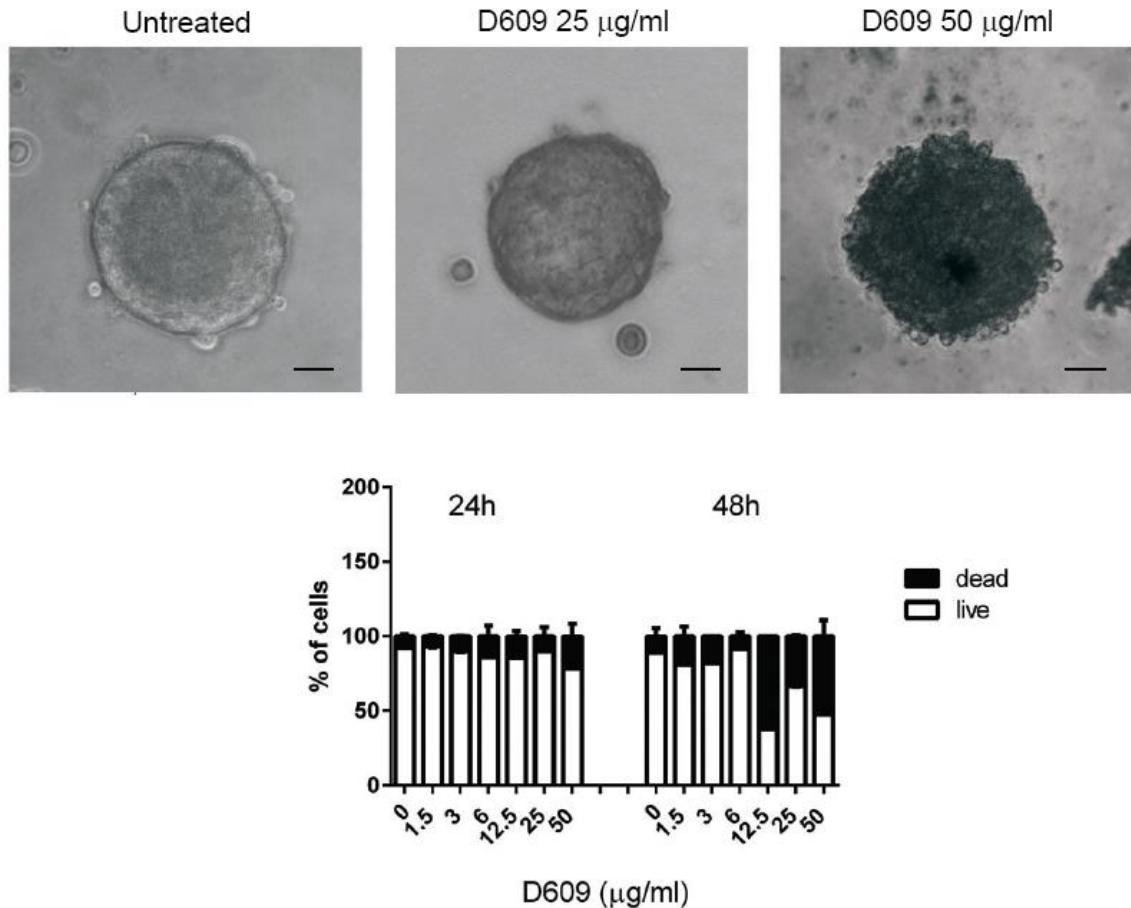

**Evaluation of the effects of PC-PLC inhibition on A431 spheroid cell morphology and death.** A431 adherent cells were plated in low attachment conditions and cultured in the presence of 10% FCS to form spheroids. The upper panels show representative images of an untreated spheroid (left); a spheroid exposed for 24 hours to 25  $\mu\text{g/ml}$  D609 (central) and an example of “dead spheroid” under conditions of 24h cell exposure to 50  $\mu\text{g/ml}$  D609 (right). Scale bar, 100  $\mu\text{m}$ . **Effects of D609 on vitality/mortality of A431 spheroids.** Cells were seeded 72 hours before adding different doses of D609 and monitored for 24h and 48h afterwards. Cell counts (mean  $\pm$  SD,  $n = 3$ ) of live (white columns) and dead (black columns) cells were measured by Trypan blue exclusion test.
